# Supplementary material for: CASP microdomain formation requires cross cell wall stabilization of domains and non-cell autonomous action of LOTR1
Source: eLife journal article supplement (doi:10.7554/elife.69602), 2022-01-14
Supplement: supp [file 20170314_PI penetrance_forR.xlsx]

## Sheet: Sheet2
Cells	Genotype
14	CASP1GFP
15	CASP1GFP
15	CASP1GFP
14	CASP1GFP
12	CASP1GFP
12	CASP1GFP
15	CASP1GFP
13	CASP1GFP
28	lotr1-1
33	lotr1-1
36	lotr1-1
31	lotr1-1
31	lotr1-1
34	lotr1-1
36	lotr1-1
34	lotr1-1
32	lotr1-1
33	lotr1-1
31	lotr1-1
34	lotr1-1
30	sgn1-2
34	sgn1-2
30	sgn1-2
31	sgn1-2
30	sgn1-2
29	sgn1-2
29	sgn1-2
28	lotr1-1 sgn1-2
29	lotr1-1 sgn1-2
30	lotr1-1 sgn1-2
34	lotr1-1 sgn1-2
28	lotr1-1 sgn1-2
27	lotr1-1 sgn1-2
31	lotr1-1 sgn1-2
29	lotr1-1 sgn1-2
34	lotr1-1 sgn1-2
29	lotr1-1 sgn1-2
34	lotr1-1 sgn1-2
97	sgn3-3
95	sgn3-3
89	sgn3-3
85	sgn3-3
95	sgn3-3
85	sgn3-3
89	sgn3-3
90	sgn3-3
96	lotr1-1 sgn3-3
101	lotr1-1 sgn3-3
89	lotr1-1 sgn3-3
99	lotr1-1 sgn3-3
105	lotr1-1 sgn3-3
100	lotr1-1 sgn3-3
90	lotr1-1 sgn3-3
28	esb1-1
25	esb1-1
29	esb1-1
28	esb1-1
24	esb1-1
30	esb1-1
35	esb1-1
29	lotr1-1 esb1-1
27	lotr1-1 esb1-1
29	lotr1-1 esb1-1
29	lotr1-1 esb1-1
24	lotr1-1 esb1-1
27	lotr1-1 esb1-1
28	lotr1-1 esb1-1
31	lotr1-1 esb1-1
