# Supplementary material for: CASP microdomain formation requires cross cell wall stabilization of domains and non-cell autonomous action of LOTR1
Source: eLife journal article supplement (doi:10.7554/elife.69602), 2022-01-14

Endodermal cells after onset of elongation

background    wild-type    lotr1

40  
30  
20  
10  
0

ctrl

LOTR1

SHR

CIF2

SCR

CASP1

ELTP

C1

35S

Genotype

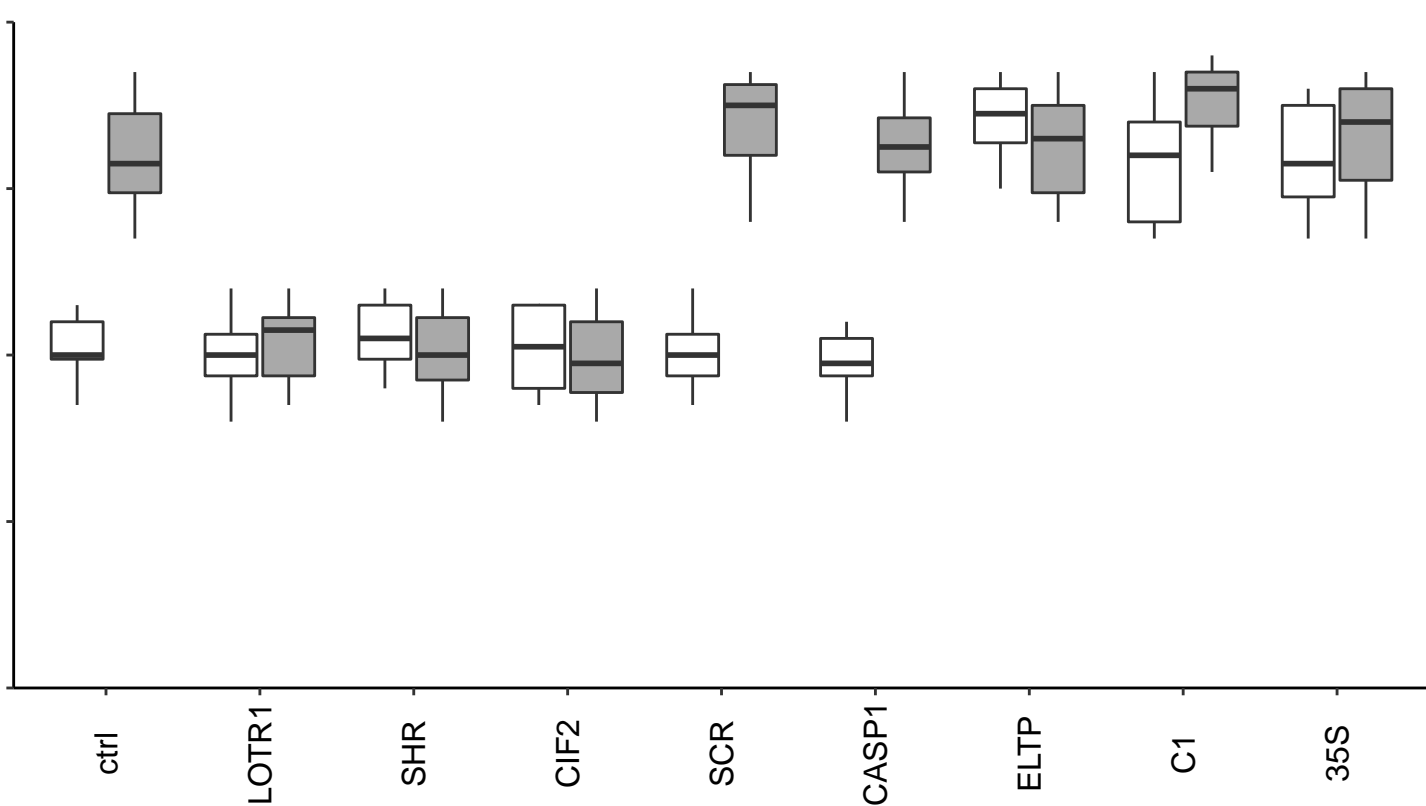

Supplement: supp [file 20200116_PI uptake complementation lines_full.pdf › Kolbeck et al_source files/Figure 5-source data 2/Figure 5D_PI uptake copy/20200116_PI uptake complementation lines_full.pdf]
