# Supplementary material for: CASP microdomain formation requires cross cell wall stabilization of domains and non-cell autonomous action of LOTR1
Source: eLife journal article supplement (doi:10.7554/elife.69602), 2022-01-14
Supplement: supp [file elife_poa_e69602_Figure_5_figure_supplement_1.pdf › elife_poa_e69602_Figure_5_figure_supplement_1.pdf]

A

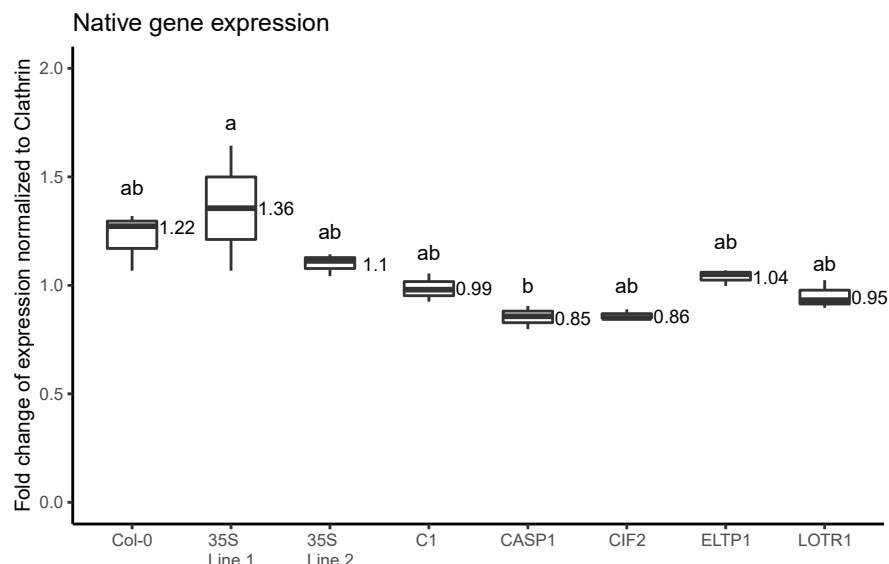

B

## Promoter driving transgene expression

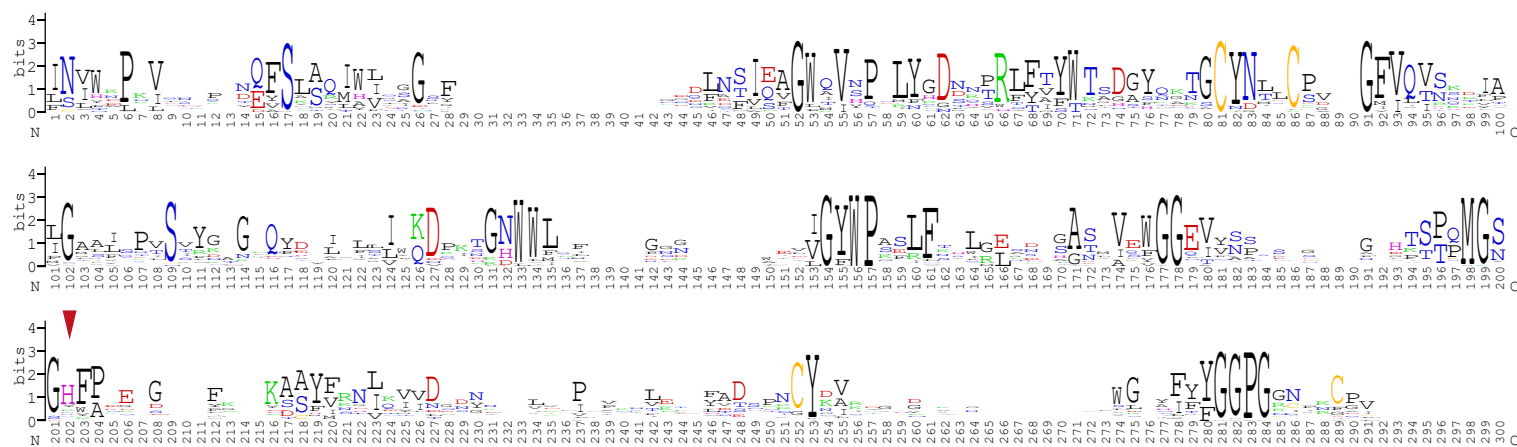

C

|               |                                                                |
|---------------|----------------------------------------------------------------|
| mepS (E.coli) | CSANNTAKNMHPETRAV--GSETSSLQASQDEFENLVRNV DVKSRIM-DQYAD-----    |
| Neprosin      | QGANATINIWEPNLKNPNGDFSLTWIWI SAGS-GSSLNTIEAGWQVYPGR TGDSQPRFFI |
| LOTR1         | -----INVWAPRVTDAY-EFSLSQIWLISGSFGHDLNTIEAGWQVSPELYGDNYP RFFFT  |
| At1g10750     | -----INVWAPQVQNQY-EFSLSQIWIISGSFGNDLNTIEAGWQVSPELYGDNYP RFFFT  |
| At1g70550     | -----INVWSPRVTSQY-EFGLSQIWVIAGSFTHDLNTIEAGWQISPELYGDTYPRFF FT  |
| At1g23340     | -----INVWTPRVISQY-EFSLSQIWI IAGSFAGDLNTIEAGWQISPELYGDTNPRFF FT |
|               | : * : : . . : . . . . . : . *                                  |
| mepS (E.coli) | -WKGVRYRLGGSTKKGIDCSGFVQRTFREQFGLLEL-PRSTYE--QQEMGKSVSR-----   |
| Neprosin      | YWTADGYTSTGCDY--LTCPGFVQTNNYYAIGMALQP-SVYGGQQYELNESIQ RDPATGN  |
| LOTR1         | YWTTDAYQATGCYN--LLCSGFVQTNNKIAIGA AISPRSSYNGRQFDIGLMIWKDPKHGH  |
| At1g10750     | YWTNDAYQATGCYN--LLCSGFVQTNSEIAIGA AISPSSSYKGGQFDITLLIWKDPKHGN  |
| At1g70550     | YWTSDAYRTTGCYN--LLCSGFVQTNRRIAIGA AISPRSSYKGGQFDISLLIWKDPKHGH  |
| At1g23340     | YWTSDAYQATGCYN--LLCSGFVQTNNR IAIGA AISPVSSYKGGQFDISLLIWKDPKHGH |
|               | * . * . . : * . * * * . : * * * * * : * * * * * : . .          |
| mepS (E.coli) | -----SNLRTGDLVLFRA G-----STGRHVGIYIGNNQFVHAST                  |
| Neprosin      | WWLYL-WGTVVGYWPASIYNSITNGADTVEWGGEIYDSSGTGGFHTTTQMCSGHF PTEGY  |
| LOTR1         | WWLELGNGLLVGYWPAFLF SHLRSHASMVQFGGEV VNSR-SSGAHTGTQMCSGHFADEGF |
| At1g10750     | WWLEFGSGILVGYWPSFLF THLKEHASMVQYGG EIVNSS-PFGAHTSTQMCSGHFAEEGF |
| At1g70550     | WWLQFGSGALVGYWPAFLF THLKQHGS MVQFGGEIVNNR-PGGSHTTTQMCSGHFAEGEF |
| At1g23340     | WWLQFGSGTLVGYWPVSLF THLREHGNMVQFGGEIVNTR-PGGSHTSTQMCSGHFAEGEF  |
|               | . : : * . * * * . : * * * . : * * * .                          |
| mepS (E.coli) | SSGVIISSMNEPY-WKKRYNEA---RRVLSRS-----                          |
| Neprosin      | GKASYVRDLQCVD TYGNVISPTANSFQGIAPAPNCYNYQFQQGSSEL---YLFYGGPGCQ  |
| LOTR1         | EKAAYFRNLQVVD-WDNNLLPLKN-LHVLADHPAC YD--IRQGKNNVWGTYFYFGP---   |
| At1g10750     | TKSSYFRNIQVVD-WDNNLVPSPN-LRVLADHPNC YD--IQGGSNRAWGSYFYFGP---   |
| At1g70550     | GKASYFRNLQIVD-WDNTLIPASN-LKILADHPNC YD--IRGGTNRVWGNFYFYFGP---  |
| At1g23340     | GKASYFRNLQMVD-WDNTLIPISN-LKVLADHPNC YD--IRGGVNRVWGNFFYFGP---   |
|               | . . . : : : . : :                                              |

Fig. S5
