# Supplementary material for: CASP microdomain formation requires cross cell wall stabilization of domains and non-cell autonomous action of LOTR1
Source: eLife journal article supplement (doi:10.7554/elife.69602), 2022-01-14
Supplement: supp [file patch quantification_sorted for R.xlsx]

## Sheet: Sheet2
Genotype	Sample	Cell	Location	Patch_number	Cell_length
35S-LOTR1	1	1	inside	17	110
35S-LOTR1	1	1	outside	0	110
35S-LOTR1	1	2	inside	17	135
35S-LOTR1	1	2	outside	1	135
35S-LOTR1	1	3	inside	24	81
35S-LOTR1	1	3	outside	5	81
35S-LOTR1	1	4	inside	7	84
35S-LOTR1	1	4	outside	0	84
35S-LOTR1	1	5	inside	9	73
35S-LOTR1	1	5	outside	1	73
35S-LOTR1	1	6	inside	9	145
35S-LOTR1	1	6	outside	0	145
35S-LOTR1	1	7	inside	6	94
35S-LOTR1	1	7	outside	0	94
35S-LOTR1	1	8	inside	13	78
35S-LOTR1	1	8	outside	0	78
C1-LOTR1	1	1	inside	17	84.7
C1-LOTR1	1	1	outside	0	84.7
C1-LOTR1	1	2	inside	17	57.8
C1-LOTR1	1	2	outside	1	57.8
C1-LOTR1	1	3	inside	24	132
C1-LOTR1	1	3	outside	5	132
C1-LOTR1	1	4	inside	7	44.1
C1-LOTR1	1	4	outside	0	44.1
C1-LOTR1	1	5	inside	9	64.6
C1-LOTR1	1	5	outside	1	64.6
C1-LOTR1	1	6	inside	9	68.1
C1-LOTR1	1	6	outside	0	68.1
C1-LOTR1	2	1	inside	6	70
C1-LOTR1	2	1	outside	0	70
C1-LOTR1	2	2	inside	13	91.6
C1-LOTR1	2	2	outside	0	91.6
C1-LOTR1	2	3	inside	12	99.6
C1-LOTR1	2	3	outside	1	99.6
C1-LOTR1	2	4	inside	6	108.8
C1-LOTR1	2	4	outside	5	108.8
C1-LOTR1	2	5	inside	9	78.5
C1-LOTR1	2	5	outside	7	78.5
C1-LOTR1	2	6	inside	11	91.3
C1-LOTR1	2	6	outside	10	91.3
lotr1-10	1	1	inside	8	108.9
lotr1-10	1	1	outside	3	108.9
lotr1-10	1	2	inside	5	67.2
lotr1-10	1	2	outside	2	67.2
lotr1-10	1	3	inside	7	62
lotr1-10	1	3	outside	1	62
lotr1-10	1	4	inside	3	74.8
lotr1-10	1	4	outside	3	74.8
lotr1-10	1	5	inside	4	65.6
lotr1-10	1	5	outside	1	65.6
lotr1-10	1	6	inside	12	88.4
lotr1-10	1	6	outside	5	88.4
lotr1-10	2	1	inside	10	59.3
lotr1-10	2	1	outside	0	59.3
lotr1-10	2	2	inside	13	55
lotr1-10	2	2	outside	0	55
lotr1-10	2	3	inside	10	136.5
lotr1-10	2	3	outside	2	136.5
lotr1-10	2	4	inside	3	127.2
lotr1-10	2	4	outside	0	127.2
lotr1-10	2	5	inside	5	109.7
lotr1-10	2	5	outside	1	109.7
lotr1-10	2	6	inside	11	90.6
lotr1-10	2	6	outside	0	90.6
