# Supplementary material for: CASP microdomain formation requires cross cell wall stabilization of domains and non-cell autonomous action of LOTR1
Source: eLife journal article supplement (doi:10.7554/elife.69602), 2022-01-14

Fold change of expression normalized to Clathrin

60

40

20

0

p35S A

p35S B

pC1 A

pCASP1

pCIF2

pELTP1

pLOTR1

Promoter driving transgene expression

background

Col-0

lotr1-10

d

d

d

d

d

d

c

cd

b

cd

ab

a

d

d

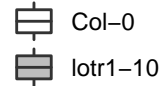

Supplement: supp [file qPCR results tissue specific expression.pdf › Kolbeck et al_source files/Figure 5-source data 1/Figure 5C_qPCR expression copy/qPCR results tissue specific expression.pdf]
