# Supplementary material for: CASP microdomain formation requires cross cell wall stabilization of domains and non-cell autonomous action of LOTR1
Source: eLife. 2022 Jan 14;11:e69602. doi: 10.7554/eLife.69602 (PMC8794472; doi:10.7554/eLife.69602)
Supplement: Supplementary file 1. [file elife-69602-supp2.xlsx]

## Sheet: Sheet1
NCBI Reference	TAIR-ID	Uniprot-ID	Signal peptide (pred.)	Transmembrane domain (pred.)	Comment
Sequence ID: NP_172490.1	AT1G10190	Q8VYE1	no	no
Sequence ID: NP_172545.1	AT1G10750	Q84JS7	no	yes	50 aa cytoplasmic N-terminus
Sequence ID: NP_173748.2	AT1G23340	Q8GY67	yes
Sequence ID: NP_175933.1	AT1G55360	Q9C8A7	yes
Sequence ID: NP_177212.2	AT1G70550	Q84VY0	yes
Sequence ID: NP_179366.1	AT2G17750	Q1PF53	yes
Sequence ID: NP_179526.2	AT2G19360	F4ISH3	no	yes	6 aa cytoplasmic N-terminus
Sequence ID: NP_001118348.1	AT2G20170	Q9SL64	yes
Sequence ID: NP_180067.1	AT2G24950	Q9SK38	yes
Sequence ID: NP_180300.2	AT2G27320	Q5BPS8	yes
Sequence ID: NP_181068.1	AT2G35250	O82168	yes
Sequence ID: NP_850293.2	AT2G38255	F4ISW5	no	no	cut off Neprosin domain (104/223aa)
Sequence ID: NP_030959.1	AT2G44210	B9DGK6	yes
Sequence ID: NP_181951.3	AT2G44220	F4IT63	yes
Sequence ID: NP_030962.1	AT2G44240	O64859	yes
Sequence ID: NP_181954.2	AT2G44250	F4IT66	yes
Sequence ID: NP_566457.1	AT3G13510	Q9LJE0	yes
Sequence ID: NP_190406.2	AT3G48230	Q8GX31	yes
Sequence ID: NP_192759.2	AT4G10210	F4JLL3	yes
Sequence ID: NP_192760.2	AT4G10220	F4JLL4	yes
Sequence ID: NP_193241.2	AT4G15050	Q1PE81	yes
Sequence ID: NP_680689.2	AT4G15053	F4JJC7	no	yes	5 aa cytoplasmic N-terminus
Sequence ID: NP_193483.1	AT4G17505	F4JP70	yes		no Neprosin_AP domain
Sequence ID: NP_193520.3	AT4G17860	Q1PE74	yes
Sequence ID: NP_001320038.1	AT4G23080	F4JMS0	no	yes	6 aa cytoplasmic N-terminus
Sequence ID: NP_194066.2	AT4G23350	F4JNI5	yes
Sequence ID: NP_001329052.1	AT4G23355	A0A1P8B6J1	yes
Sequence ID: NP_194067.3	AT4G23360	F4JNI6	yes
Sequence ID: NP_001328209.1	AT4G23365	A0A1P8B3Z8	yes
Sequence ID: NP_001320047.1	AT4G23370	F4JNI7	yes
Sequence ID: NP_001329263.1	AT4G23373	A0A1P8B762	yes		2x truncated Neprosin annotations (75+71/223aa)
Sequence ID: NP_194069.2	AT4G23380	F4JNI8	yes
Sequence ID: NP_194070.2	AT4G23390	Q8GXV8	yes
Sequence ID: NP_001331445.1	AT5G04937	A0A1P8BDW2	no	no	Neprosin domain only (177/223)
Sequence ID: NP_196122.1	AT5G05030	Q9FF71	yes
Sequence ID: NP_196727.1	AT5G11660	Q9LYG4	no	no	Neprosin domain only
Sequence ID: NP_197347.1	AT5G18460	Q8LFH3	yes
Sequence ID: NP_197418.2	AT5G19170	F4JZN1	no	yes	6 aa cytoplasmic N-terminus
Sequence ID: NP_568470.1	AT5G25410	Q941C9	yes
Sequence ID: NP_568471.1	AT5G25415	F4JWS2	no	no	Neprosin domain only
Sequence ID: NP_197967.2	AT5G25950	F4JYA0	yes
Sequence ID: NP_001318652.1	AT5G25960	Q1PDT5	no	no	Neprosin domain only
Sequence ID: NP_198483.2	AT5G36680	F4K4G7	yes		Neprosin domain only
Sequence ID: NP_198568.1	AT5G37520	F4K779	no	no	Neprosin domain only
Sequence ID: NP_199432.1	AT5G46200	Q9FGP1	yes
Sequence ID: NP_199493.1	AT5G46810	Q9FIP4	no	no
Sequence ID: NP_199494.1	AT5G46820	Q9FIP3	no	no
Sequence ID: NP_199826.1	AT5G50150	Q9FG96	yes
Sequence ID: NP_001190555.1	AT5G56530	Q9LVC1	yes
Sequence ID: NP_200846.1	AT5G60380	F4JYY1	yes
		Occurrences	36	5
		Percentage	73.4694	10.2041
