# Supplementary figures and images for: CASP microdomain formation requires cross cell wall stabilization of domains and non-cell autonomous action of LOTR1
Source: eLife journal article supplement (doi:10.7554/elife.69602), 2022-01-14

Ectopic CASP1-GFP deposits [EN-PE/total]

a

1.00  
0.75  
0.50  
0.25  
0.00

lotr1-10  
Genotype

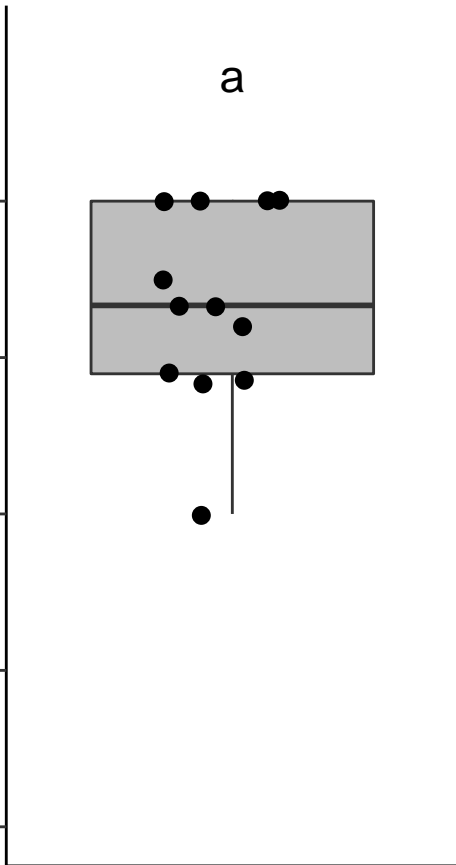

Supplement: supp [file Patch distribution.pdf › Kolbeck et al_source files/Figure 1-figure supplement 1-source data 1/Figure 1-figure supplement 1B_patch distribution/Patch distribution.pdf]

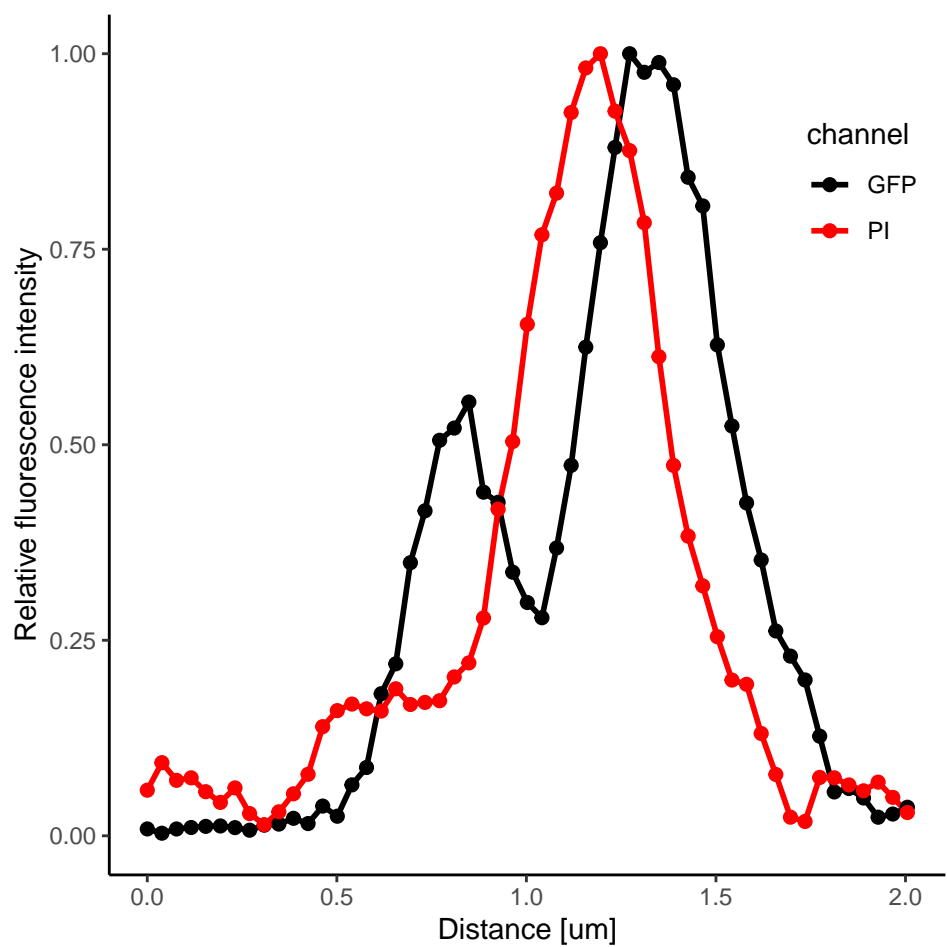

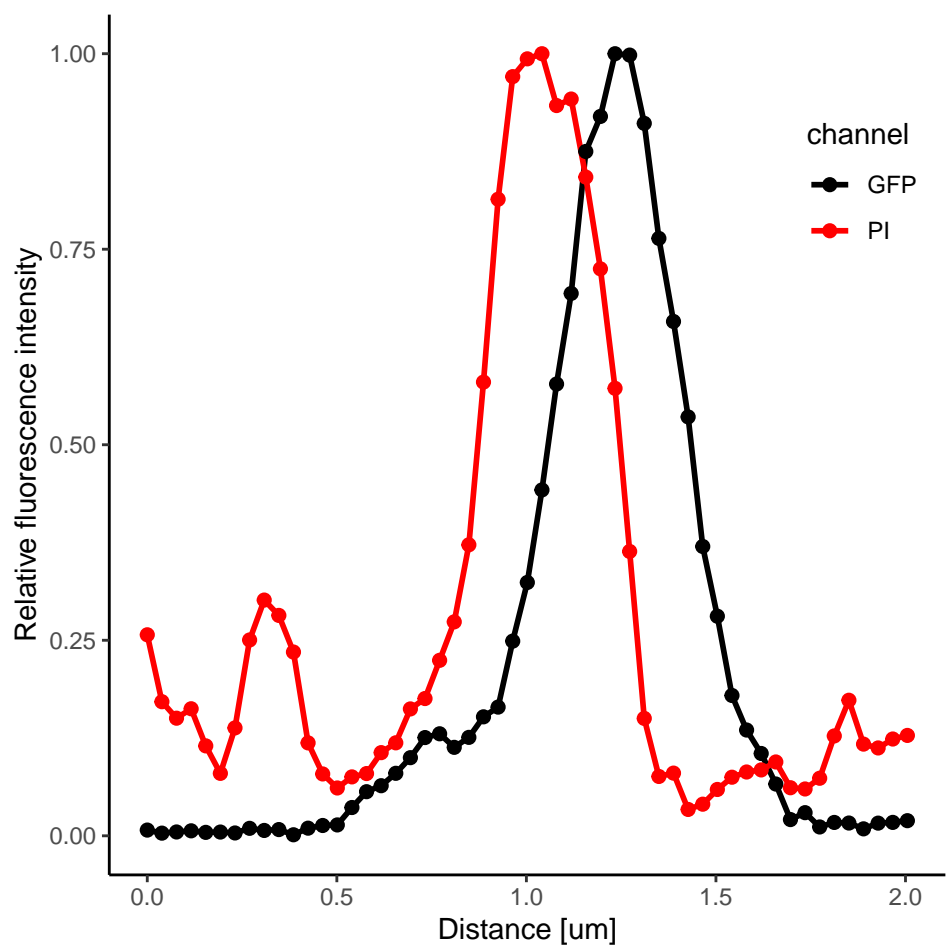

Supplement: supp [file Ablation_intensity_old.pdf › Kolbeck et al_source files/Figure 2-figure supplement 1-source data 1/Figure 2-figure supplement 1C,D-source data 1_ablation membrane quantification_mature/Ablation_intensity_old.pdf]

Relative GFP intensity to the mean

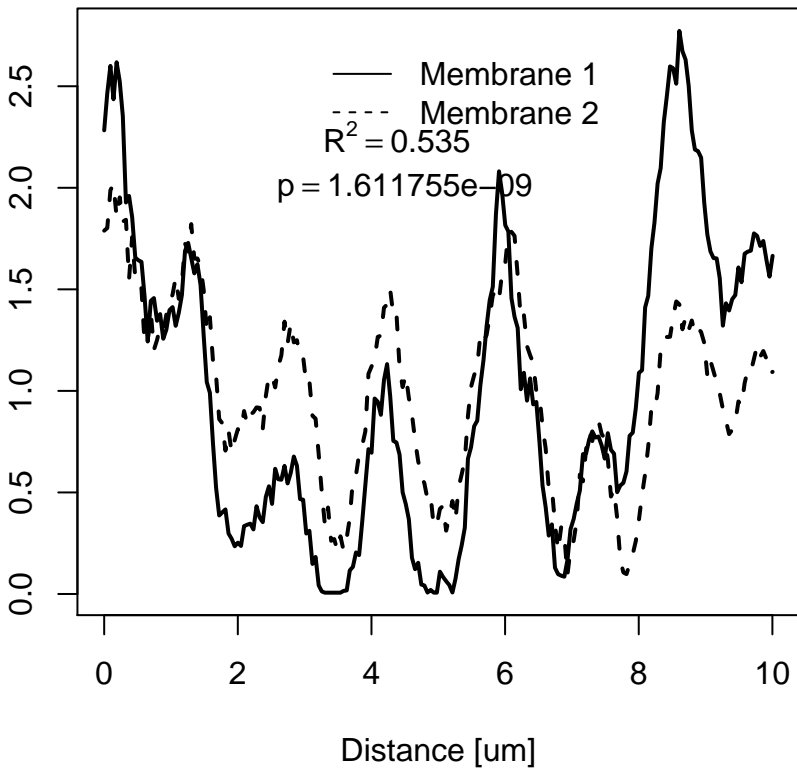

Supplement: supp [file GFP intensity coordination.pdf › Kolbeck et al_source files/Figure 2-source data 1/Figure 2B_double membrane coordination copy/GFP intensity coordination.pdf]

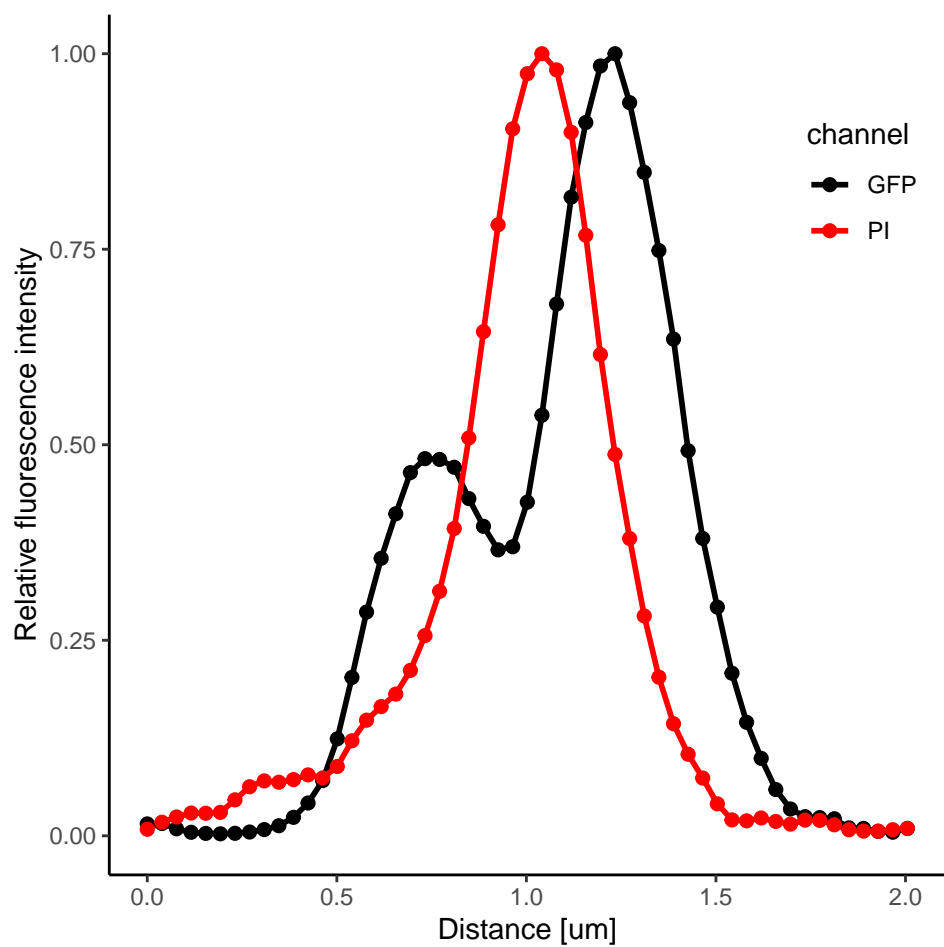

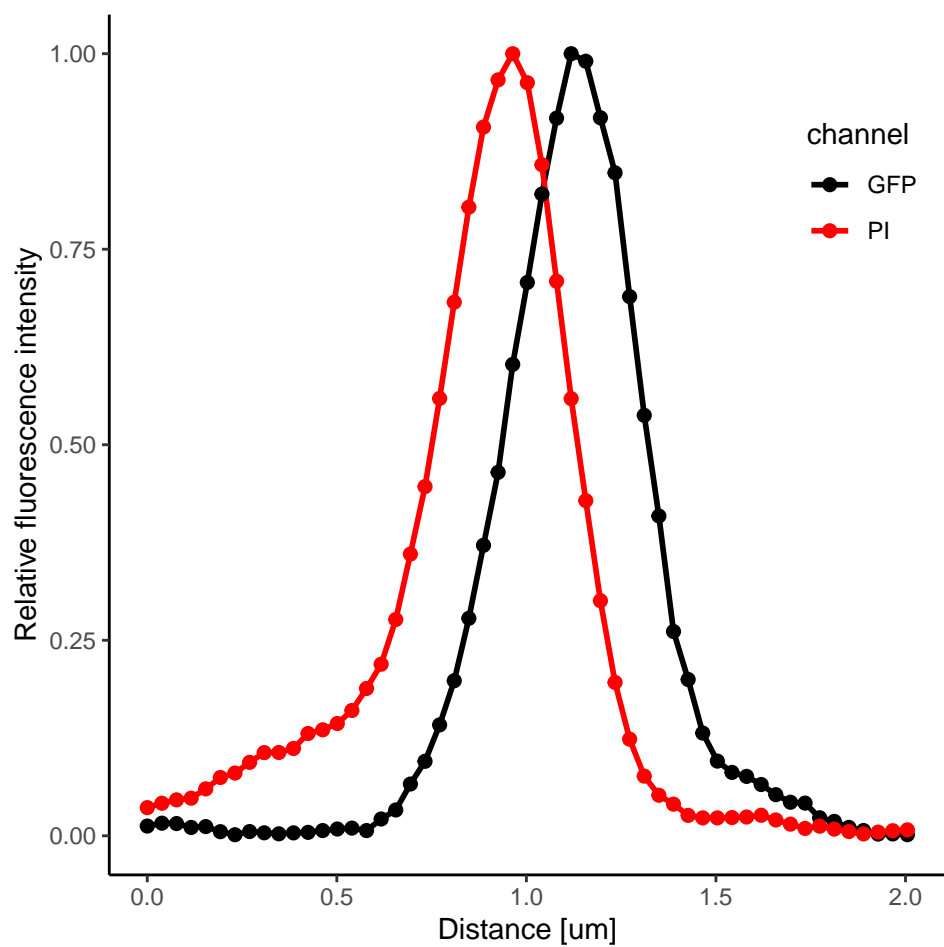

Supplement: supp [file Ablation_intensity_young.pdf › Kolbeck et al_source files/Figure 2-source data 2/Figure 2E,F_ablation membrane quantification_young copy/Ablation_intensity_young.pdf]

—●— ablation —●—

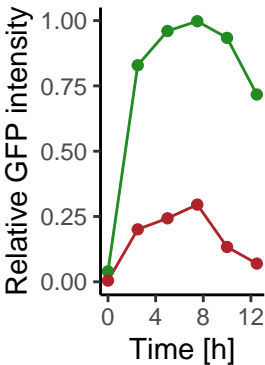

Supplement: supp [file Ablation_intensity.pdf › Kolbeck et al_source files/Figure 3-source data 1/Figure 3B_neighbour ablation copy/Ablation_intensity.pdf]

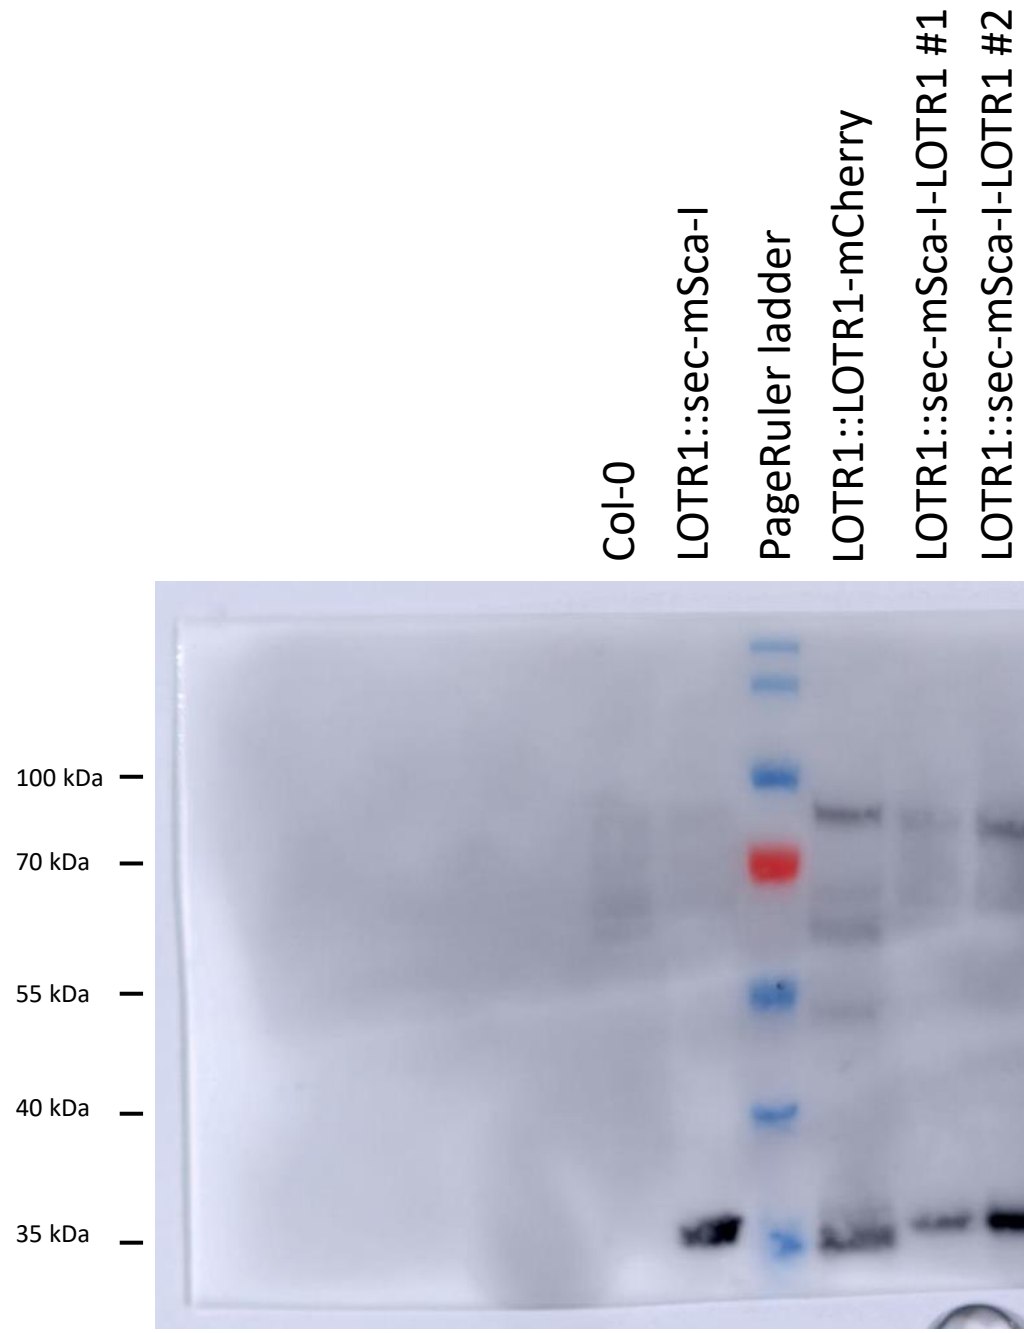

Supplement: supp [file 20190404_LOTR1 Processing_Western Blot_Annotations.pdf › Kolbeck et al_source files/Figure 4-figure supplement 1-source data 1/Figure 4-figure supplement 1C-source data 1/20190404_LOTR1 Processing_Western Blot_Annotations.pdf]

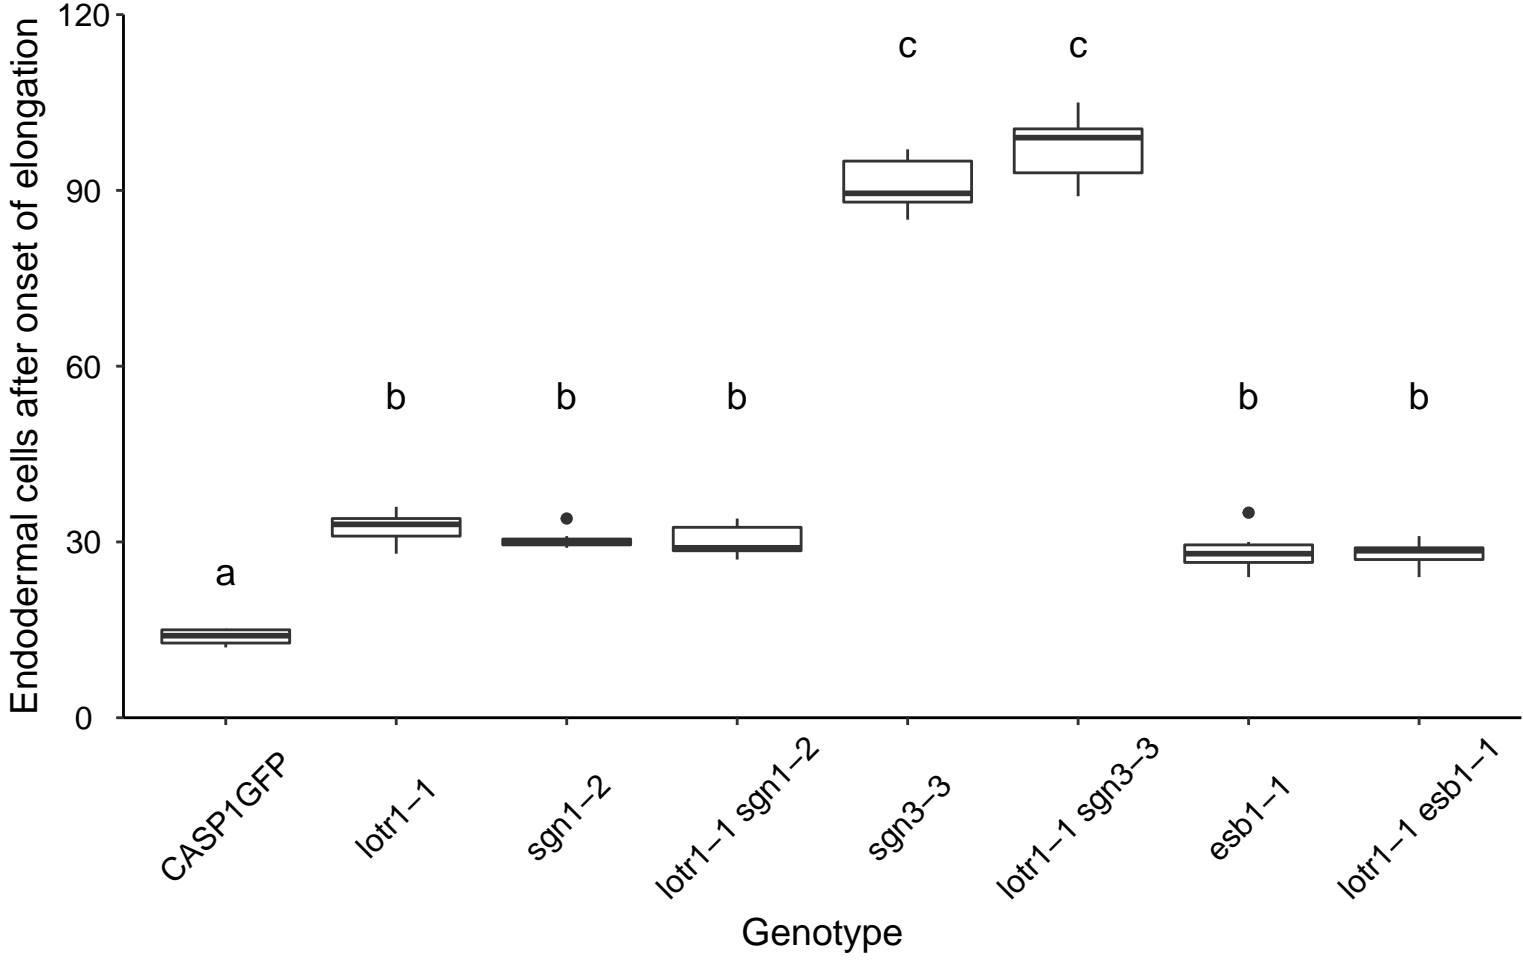

Supplement: supp [file 20170314_PI uptake mutants.pdf › Kolbeck et al_source files/Figure 4-source data 1/Figure 4C_PI uptake copy/20170314_PI uptake mutants.pdf]

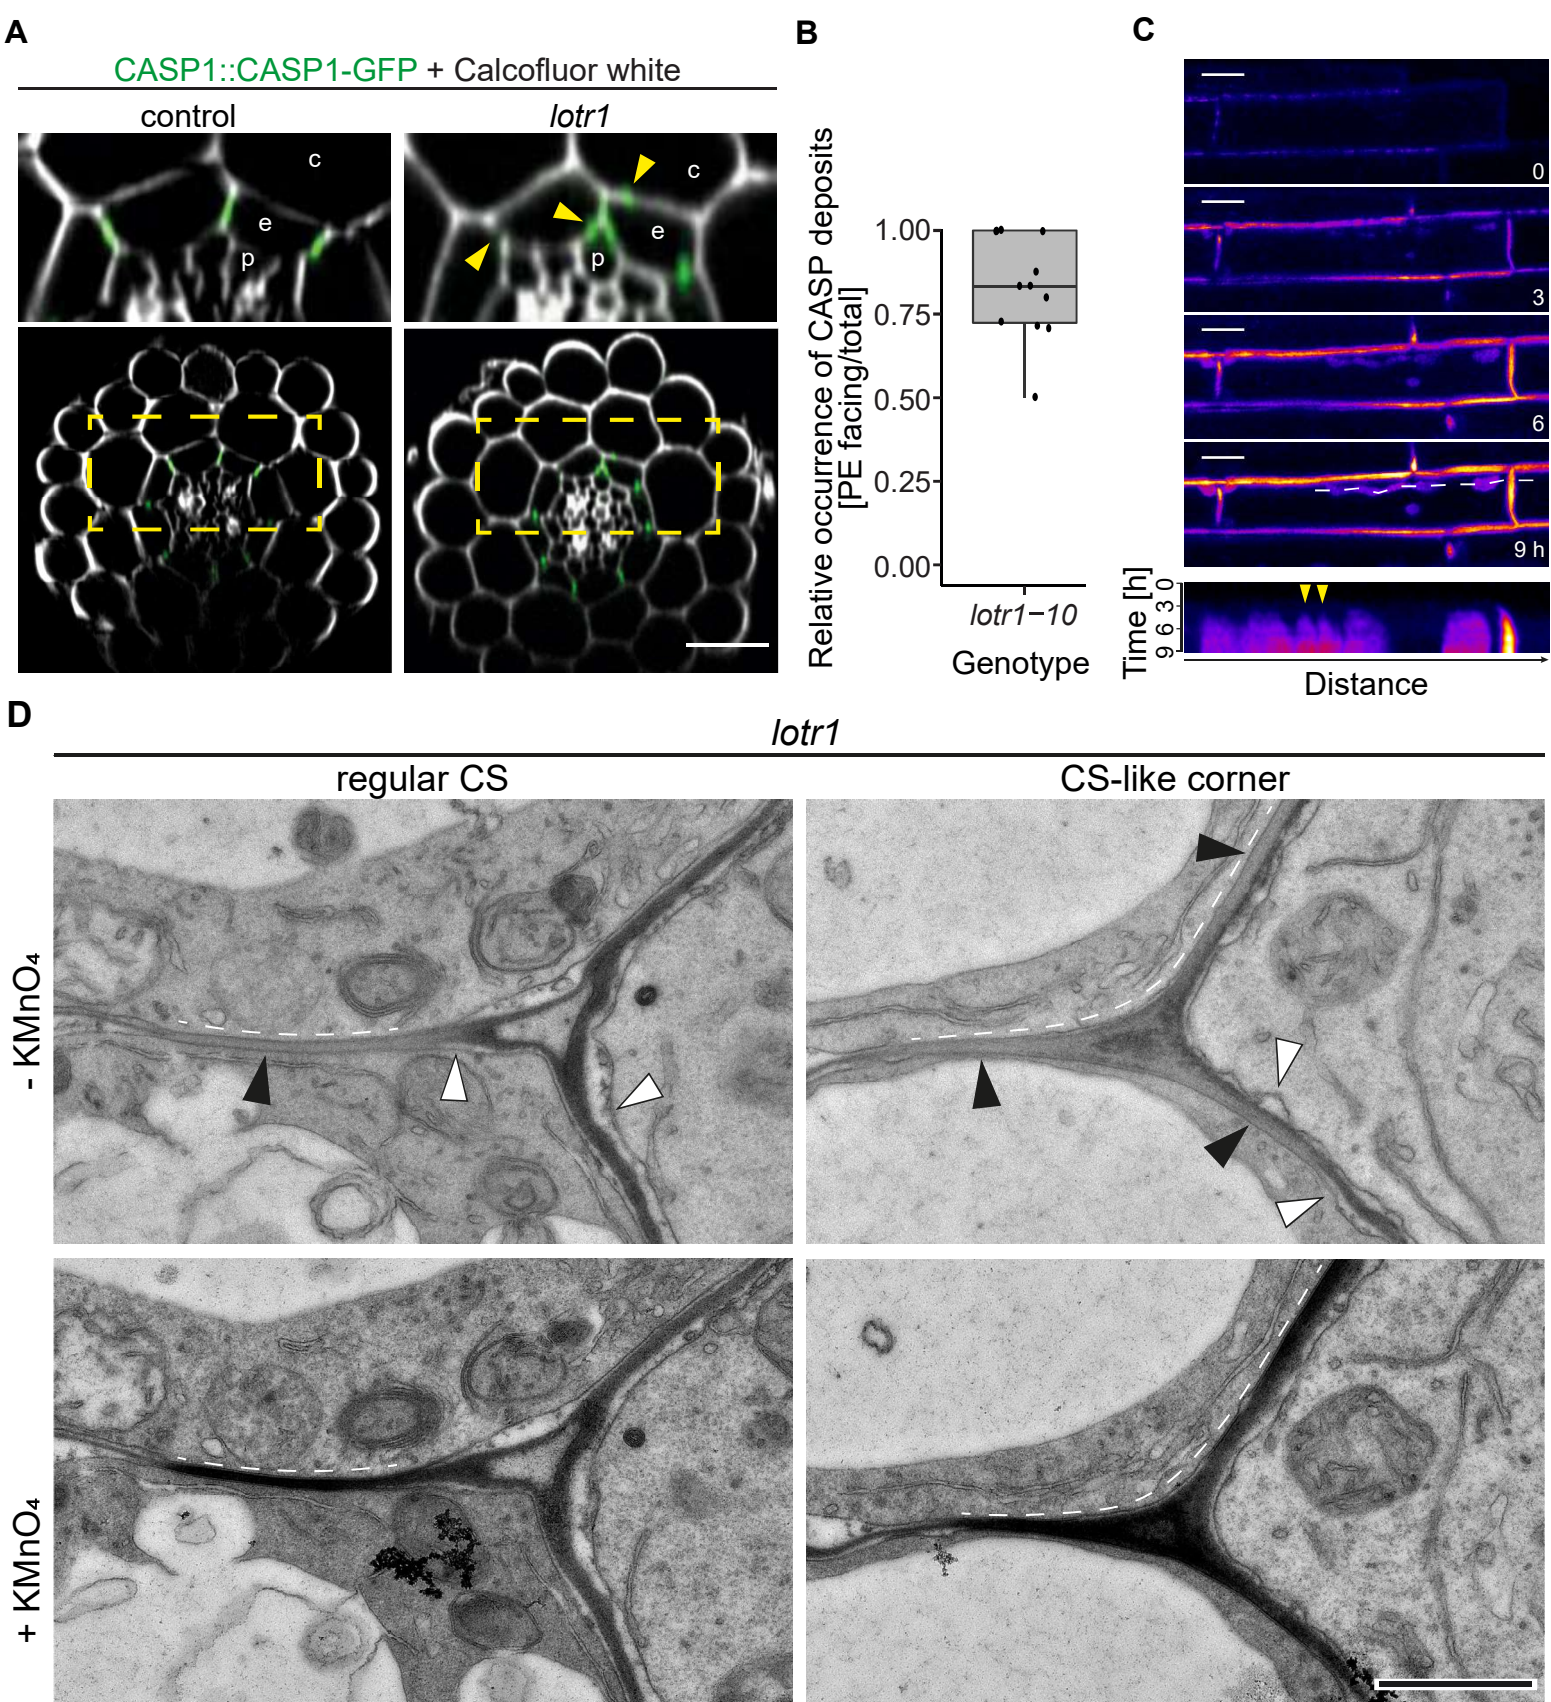

Fig. S1

Supplement: supp [file elife_poa_e69602_Figure_1_figure_supplement_1.pdf › elife_poa_e69602_Figure_1_figure_supplement_1.pdf]

**A**

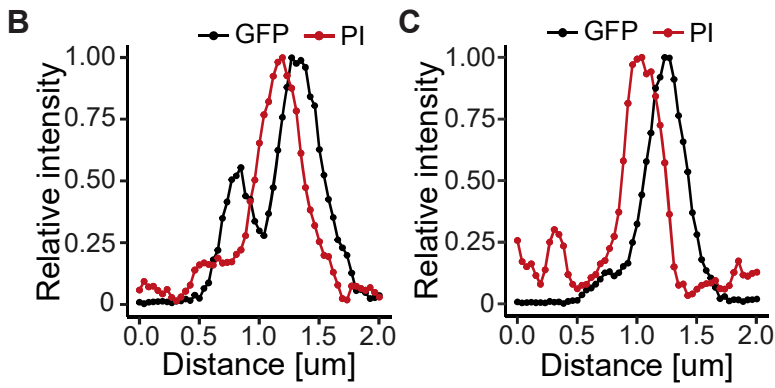

**Fig. S2**

Supplement: supp [file elife_poa_e69602_Figure_2_figure_supplement_1.pdf › elife_poa_e69602_Figure_2_figure_supplement_1.pdf]

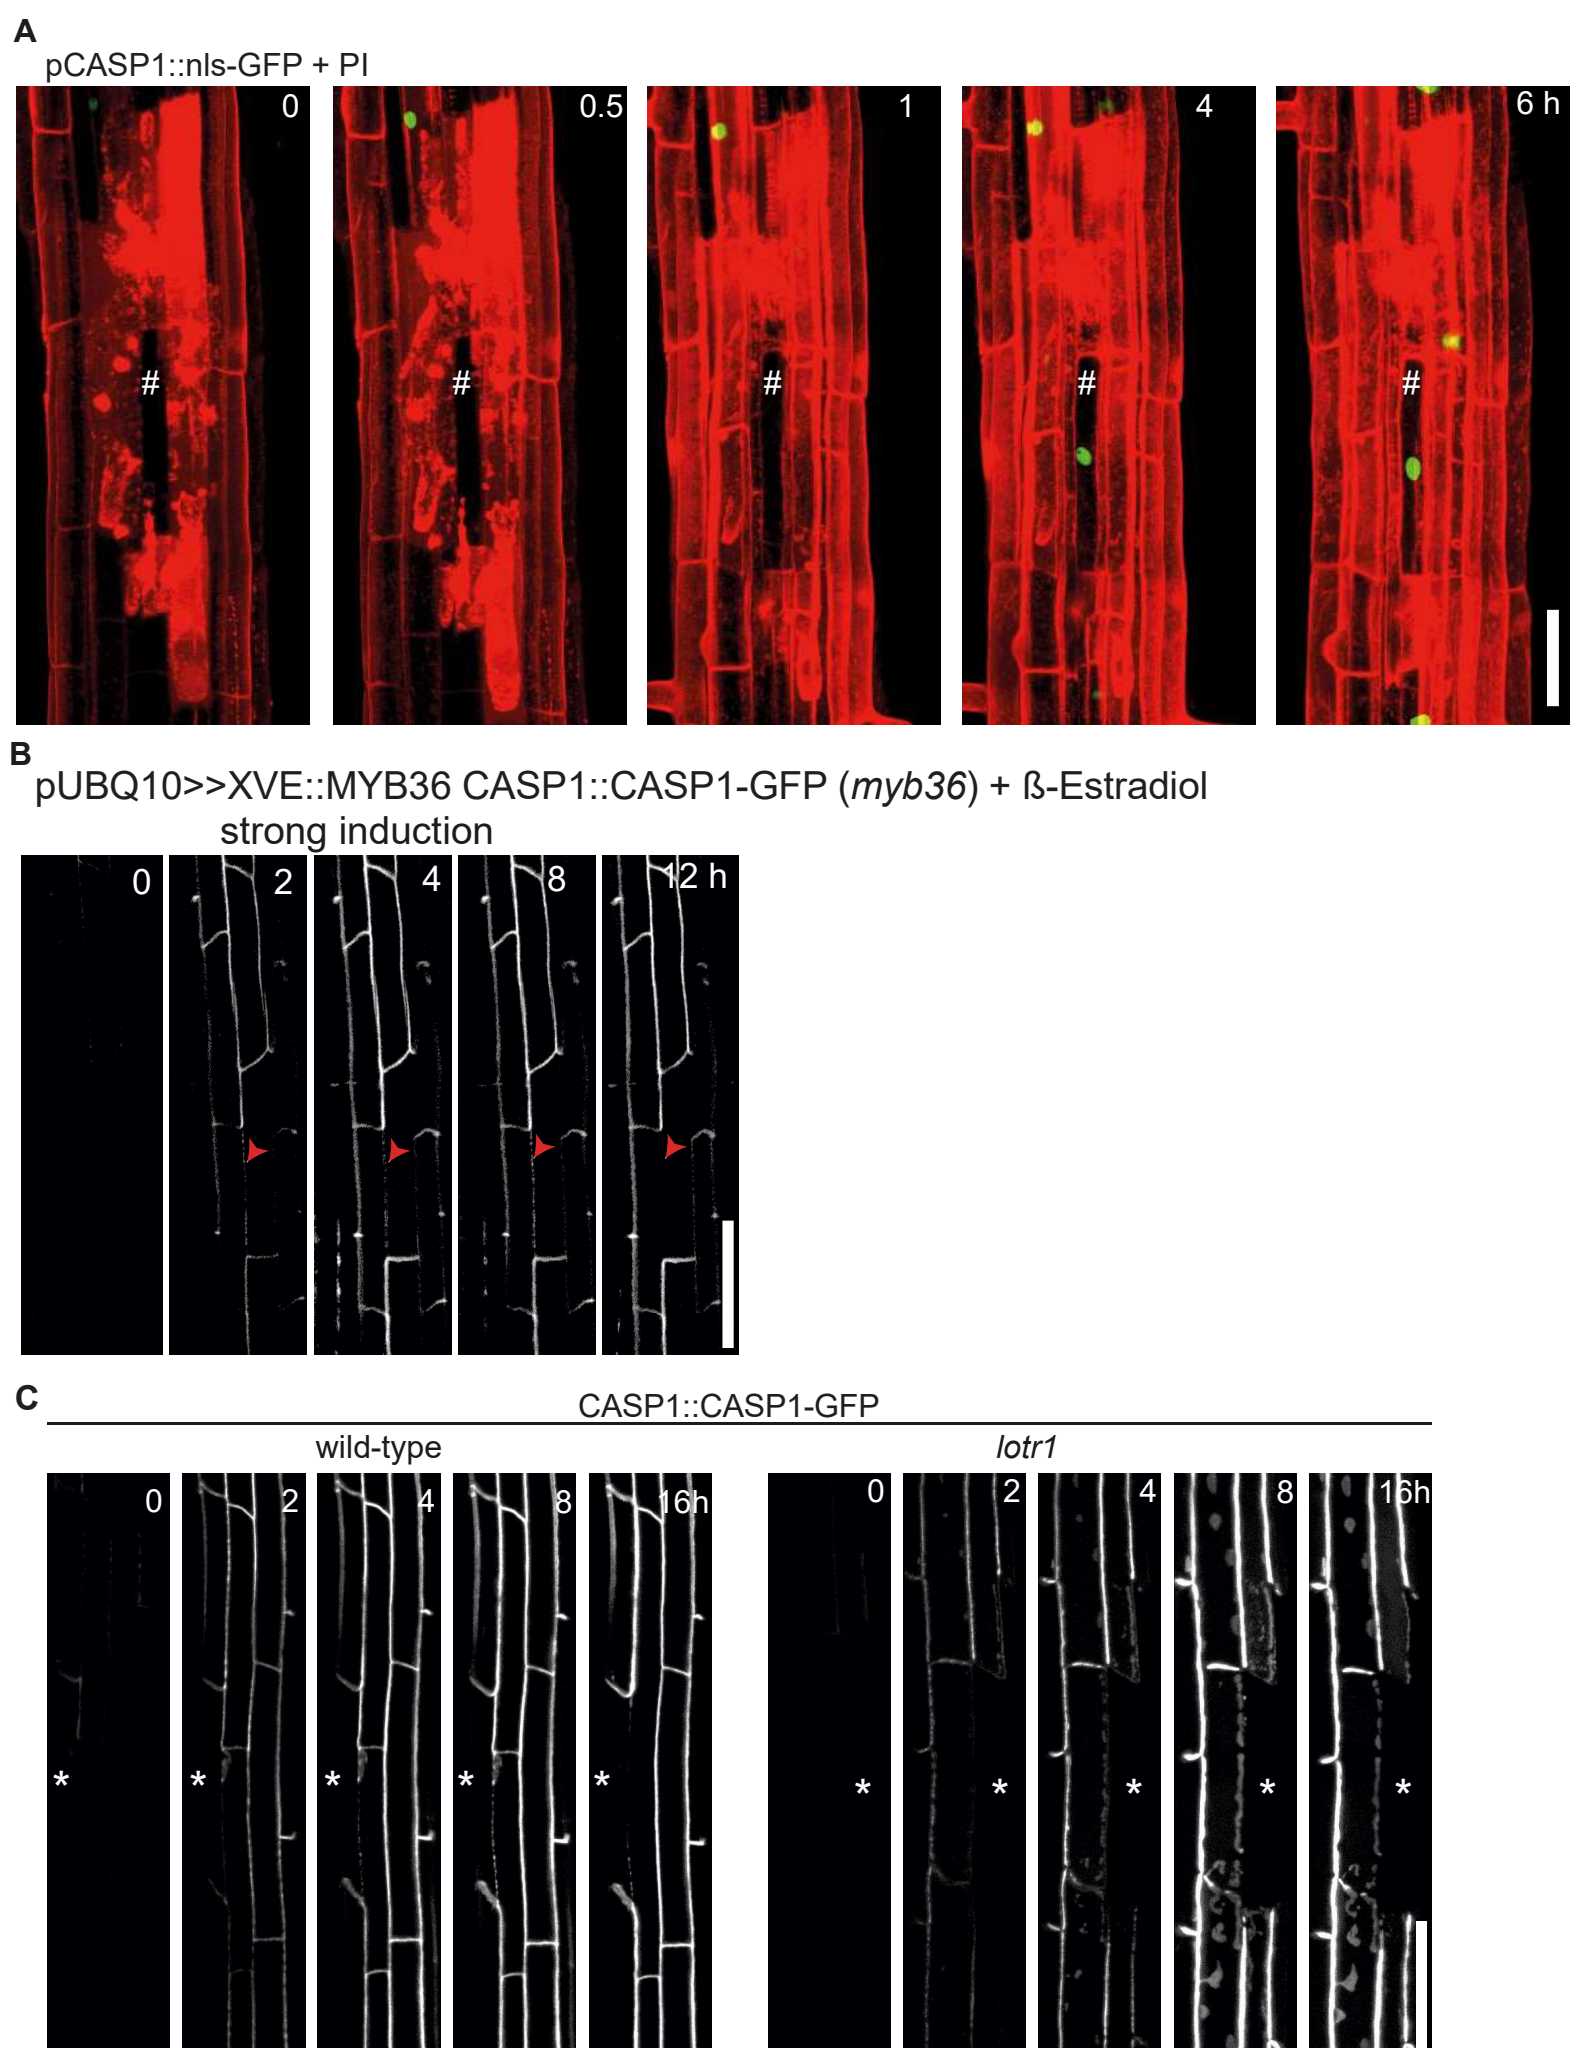

Fig. S3

Supplement: supp [file elife_poa_e69602_Figure_3_figure_supplement_1.pdf › elife_poa_e69602_Figure_3_figure_supplement_1.pdf]

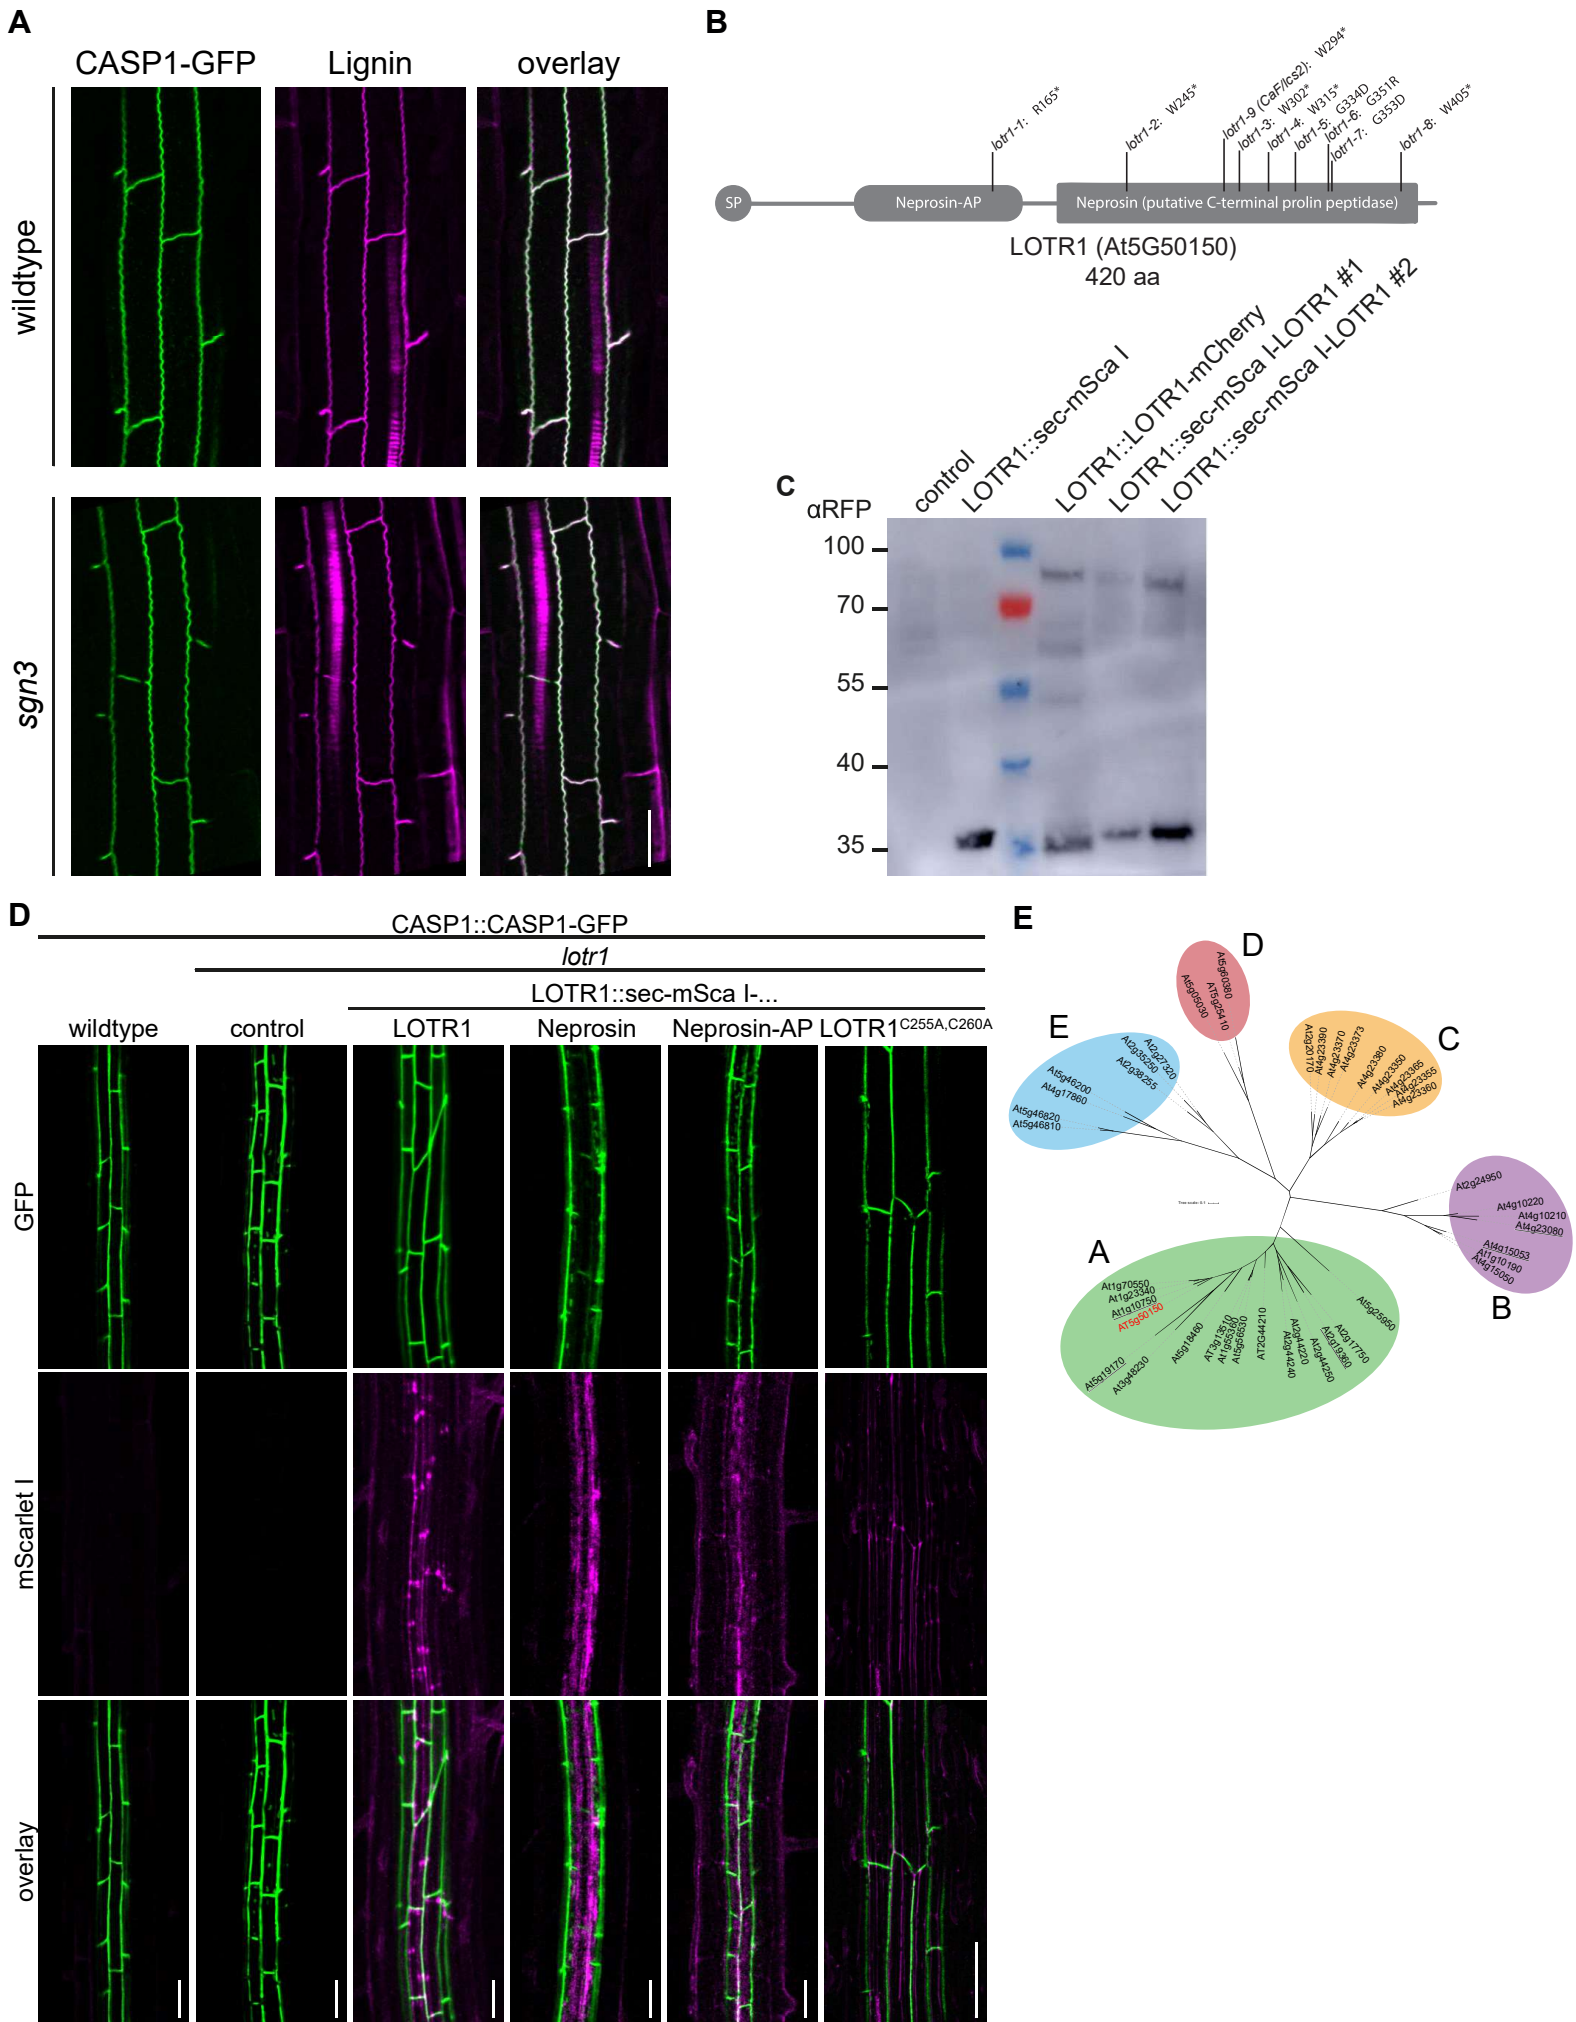

**Fig. S4**

Supplement: supp [file elife_poa_e69602_Figure_4_figure_supplement_1.pdf › elife_poa_e69602_Figure_4_figure_supplement_1.pdf]
